# Supplementary material
Source: publisher figshare collection journal article supplement (https://acs.figshare.com/ndownloader/files/5526833)
Supplement: Supplementary file 1 [file 5526833]

 
data_21aprb 
 
_audit_creation_method            SHELXL-97 
_chemical_name_systematic 
; 
 ? 
; 
_chemical_name_common             ? 
_chemical_melting_point           ? 
_chemical_formula_moiety          'C22 H19 Br N2 O2 S2' 
_chemical_formula_sum 
 'C22 H19 Br N2 O2 S2' 
_chemical_formula_weight          487.42 
 
loop_ 
 _atom_type_symbol 
 _atom_type_description 
 _atom_type_scat_dispersion_real 
 _atom_type_scat_dispersion_imag 
 _atom_type_scat_source 
 'C'  'C'   0.0033   0.0016 
 'International Tables Vol C Tables 4.2.6.8 and 6.1.1.4' 
 'H'  'H'   0.0000   0.0000 
 'International Tables Vol C Tables 4.2.6.8 and 6.1.1.4' 
 'N'  'N'   0.0061   0.0033 
 'International Tables Vol C Tables 4.2.6.8 and 6.1.1.4' 
 'O'  'O'   0.0106   0.0060 
 'International Tables Vol C Tables 4.2.6.8 and 6.1.1.4' 
 'S'  'S'   0.1246   0.1234 
 'International Tables Vol C Tables 4.2.6.8 and 6.1.1.4' 
 'Br'  'Br'  -0.2901   2.4595 
 'International Tables Vol C Tables 4.2.6.8 and 6.1.1.4' 
 
_symmetry_cell_setting            monoclinic 
_symmetry_space_group_name_H-M    P21/c 
 
loop_ 
 _symmetry_equiv_pos_as_xyz 
 'x, y, z' 
 '-x, y+1/2, -z+1/2' 
 '-x, -y, -z' 
 'x, -y-1/2, z-1/2' 
 
_cell_length_a                    14.3343(7) 
_cell_length_b                    12.9414(6) 
_cell_length_c                    12.2133(6) 
_cell_angle_alpha                 90.00 
_cell_angle_beta                  114.1340(10) 
_cell_angle_gamma                 90.00 
_cell_volume                      2067.60(17) 
_cell_formula_units_Z             4 
_cell_measurement_temperature     293(2) 
_cell_measurement_reflns_used     999
_cell_measurement_theta_min       2.2
_cell_measurement_theta_max       25.5
 
_exptl_crystal_description        block
_exptl_crystal_colour             white
_exptl_crystal_size_max           0.1
_exptl_crystal_size_mid           0.05 
_exptl_crystal_size_min           0.06 
_exptl_crystal_density_meas       ? 
_exptl_crystal_density_diffrn     1.566 
_exptl_crystal_density_method     'not measured' 
_exptl_crystal_F_000              992 
_exptl_absorpt_coefficient_mu     2.212 
_exptl_absorpt_correction_type    empirical
_exptl_absorpt_correction_T_min   0.876
_exptl_absorpt_correction_T_max   0.876
_exptl_absorpt_process_details    'SADABS' 
 
_exptl_special_details 
; 
 ? 
; 
 
_diffrn_ambient_temperature       293(2) 
_diffrn_radiation_wavelength      0.71073 
_diffrn_radiation_type            MoK\a 
_diffrn_radiation_source          'fine-focus sealed tube' 
_diffrn_radiation_monochromator   graphite 
_diffrn_measurement_device_type   'CCD area detector'
_diffrn_measurement_method        'phi and omega scans'
_diffrn_detector_area_resol_mean  ? 
_diffrn_standards_number          ? 
_diffrn_standards_interval_count  ? 
_diffrn_standards_interval_time   ? 
_diffrn_standards_decay_%         ? 
_diffrn_reflns_number             15319 
_diffrn_reflns_av_R_equivalents   0.0480 
_diffrn_reflns_av_sigmaI/netI     0.0484 
_diffrn_reflns_limit_h_min        -17 
_diffrn_reflns_limit_h_max        17 
_diffrn_reflns_limit_k_min        -15 
_diffrn_reflns_limit_k_max        15 
_diffrn_reflns_limit_l_min        -15 
_diffrn_reflns_limit_l_max        10 
_diffrn_reflns_theta_min          2.21 
_diffrn_reflns_theta_max          26.00 
_reflns_number_total              4049 
_reflns_number_gt                 3217 
_reflns_threshold_expression      >2sigma(I) 
 
_computing_data_collection        'Bruker SMART APEX' 
_computing_cell_refinement        'Bruker SMART'
_computing_data_reduction         'Bruker SAINT PLUS'
_computing_structure_solution     'SHELXS-97 (Sheldrick, 1990)' 
_computing_structure_refinement   'SHELXL-97 (Sheldrick, 1997)' 
_computing_molecular_graphics     'Ortep-3 for Windows (Farrugia, 1997)' 
_computing_publication_material   'WinGX publication routines (Farrugia, 1999)'
 
_refine_special_details 
; 
 Refinement of F^2^ against ALL reflections.  The weighted R-factor wR and 
 goodness of fit S are based on F^2^, conventional R-factors R are based 
 on F, with F set to zero for negative F^2^. The threshold expression of 
 F^2^ > 2sigma(F^2^) is used only for calculating R-factors(gt) etc. and is 
 not relevant to the choice of reflections for refinement.  R-factors based 
 on F^2^ are statistically about twice as large as those based on F, and R- 
 factors based on ALL data will be even larger. 
; 
 
_refine_ls_structure_factor_coef  Fsqd  
_refine_ls_matrix_type            full 
_refine_ls_weighting_scheme       calc  
_refine_ls_weighting_details 
 'calc w=1/[\s^2^(Fo^2^)+(0.0306P)^2^+1.7555P] where P=(Fo^2^+2Fc^2^)/3' 
_atom_sites_solution_primary      direct 
_atom_sites_solution_secondary    difmap 
_atom_sites_solution_hydrogens    geom 
_refine_ls_hydrogen_treatment     mixed 
_refine_ls_extinction_method      none 
_refine_ls_extinction_coef        ? 
_refine_ls_number_reflns          4049 
_refine_ls_number_parameters      263 
_refine_ls_number_restraints      0 
_refine_ls_R_factor_all           0.0564 
_refine_ls_R_factor_gt            0.0377 
_refine_ls_wR_factor_ref          0.0772 
_refine_ls_wR_factor_gt           0.0717 
_refine_ls_goodness_of_fit_ref    1.015 
_refine_ls_restrained_S_all       1.015 
_refine_ls_shift/su_max           0.000 
_refine_ls_shift/su_mean          0.000 
 
loop_ 
 _atom_site_label 
 _atom_site_type_symbol 
 _atom_site_fract_x 
 _atom_site_fract_y 
 _atom_site_fract_z 
 _atom_site_U_iso_or_equiv 
 _atom_site_adp_type 
 _atom_site_occupancy 
 _atom_site_symmetry_multiplicity 
 _atom_site_calc_flag 
 _atom_site_refinement_flags 
 _atom_site_disorder_assembly 
 _atom_site_disorder_group 
Br1 Br 0.42462(2) -0.21561(2) 0.14311(3) 0.02631(10) Uani 1 1 d . . . 
S1 S 0.30598(5) -0.00113(6) 0.61284(7) 0.01717(17) Uani 1 1 d . . . 
S2 S 0.02603(5) 0.16146(5) 0.47741(6) 0.01269(16) Uani 1 1 d . . . 
O1 O -0.00347(14) 0.15110(14) 0.57503(18) 0.0167(4) Uani 1 1 d . . . 
O2 O -0.04421(14) 0.13194(14) 0.35926(17) 0.0159(4) Uani 1 1 d . . . 
N1 N 0.12745(17) 0.08600(17) 0.5055(2) 0.0129(5) Uani 1 1 d . . . 
N2 N 0.21801(17) 0.15016(17) 0.6984(2) 0.0149(5) Uani 1 1 d . . . 
C1 C 0.3622(2) -0.1640(2) 0.2426(3) 0.0181(6) Uani 1 1 d . . . 
C2 C 0.2825(2) -0.2172(2) 0.2516(3) 0.0204(7) Uani 1 1 d . . . 
H2 H 0.2586 -0.2783 0.2092 0.024 Uiso 1 1 calc R . . 
C3 C 0.2388(2) -0.1784(2) 0.3249(3) 0.0179(6) Uani 1 1 d . . . 
H3 H 0.1844 -0.2136 0.3306 0.021 Uiso 1 1 calc R . . 
C4 C 0.2738(2) -0.0888(2) 0.3898(3) 0.0161(6) Uani 1 1 d . . . 
C5 C 0.3545(2) -0.0361(2) 0.3797(3) 0.0183(6) Uani 1 1 d . . . 
H5 H 0.3790 0.0244 0.4229 0.022 Uiso 1 1 calc R . . 
C6 C 0.3986(2) -0.0736(2) 0.3054(3) 0.0199(7) Uani 1 1 d . . . 
H6 H 0.4521 -0.0380 0.2980 0.024 Uiso 1 1 calc R . . 
C7 C 0.2201(2) -0.0492(2) 0.4651(3) 0.0167(6) Uani 1 1 d . . . 
H7 H 0.1795 -0.1058 0.4765 0.020 Uiso 1 1 calc R . . 
C8 C 0.1489(2) 0.0412(2) 0.4078(3) 0.0153(6) Uani 1 1 d . . . 
H8A H 0.1817 0.0914 0.3762 0.018 Uiso 1 1 calc R . . 
H8B H 0.0864 0.0176 0.3432 0.018 Uiso 1 1 calc R . . 
C9 C 0.2130(2) 0.0896(2) 0.6162(3) 0.0131(6) Uani 1 1 d . . . 
C10 C 0.2962(2) 0.1468(2) 0.8157(3) 0.0153(6) Uani 1 1 d . . . 
C11 C 0.3277(2) 0.0560(2) 0.8806(3) 0.0191(6) Uani 1 1 d . . . 
H11 H 0.3021 -0.0072 0.8444 0.023 Uiso 1 1 calc R . . 
C12 C 0.3971(2) 0.0591(2) 0.9991(3) 0.0242(7) Uani 1 1 d . . . 
H12 H 0.4177 -0.0021 1.0423 0.029 Uiso 1 1 calc R . . 
C13 C 0.4359(2) 0.1520(3) 1.0540(3) 0.0286(8) Uani 1 1 d . . . 
H13 H 0.4829 0.1537 1.1337 0.034 Uiso 1 1 calc R . . 
C14 C 0.4045(2) 0.2420(3) 0.9898(3) 0.0285(8) Uani 1 1 d . . . 
H14 H 0.4306 0.3048 1.0265 0.034 Uiso 1 1 calc R . . 
C15 C 0.3347(2) 0.2404(2) 0.8713(3) 0.0211(7) Uani 1 1 d . . . 
H15 H 0.3135 0.3019 0.8289 0.025 Uiso 1 1 calc R . . 
C16 C 0.0652(2) 0.2896(2) 0.4724(2) 0.0129(6) Uani 1 1 d . . . 
C17 C 0.0593(2) 0.3281(2) 0.3642(3) 0.0146(6) Uani 1 1 d . . . 
H17 H 0.0368 0.2866 0.2961 0.018 Uiso 1 1 calc R . . 
C18 C 0.0876(2) 0.4294(2) 0.3589(3) 0.0150(6) Uani 1 1 d . . . 
H18 H 0.0839 0.4560 0.2865 0.018 Uiso 1 1 calc R . . 
C19 C 0.1214(2) 0.4922(2) 0.4599(3) 0.0155(6) Uani 1 1 d . . . 
C20 C 0.1273(2) 0.4510(2) 0.5681(3) 0.0157(6) Uani 1 1 d . . . 
H20 H 0.1503 0.4922 0.6365 0.019 Uiso 1 1 calc R . . 
C21 C 0.0996(2) 0.3500(2) 0.5751(3) 0.0158(6) Uani 1 1 d . . . 
H21 H 0.1038 0.3229 0.6475 0.019 Uiso 1 1 calc R . . 
C22 C 0.1513(2) 0.6024(2) 0.4528(3) 0.0212(7) Uani 1 1 d . . . 
H22A H 0.2236 0.6063 0.4747 0.032 Uiso 1 1 calc R . . 
H22B H 0.1339 0.6440 0.5069 0.032 Uiso 1 1 calc R . . 
H22C H 0.1154 0.6275 0.3724 0.032 Uiso 1 1 calc R . . 
 
loop_ 
 _atom_site_aniso_label 
 _atom_site_aniso_U_11 
 _atom_site_aniso_U_22 
 _atom_site_aniso_U_33 
 _atom_site_aniso_U_23 
 _atom_site_aniso_U_13 
 _atom_site_aniso_U_12 
Br1 0.03391(19) 0.02821(18) 0.02312(18) 0.00496(15) 0.01808(16) 0.01233(15) 
S1 0.0151(4) 0.0207(4) 0.0146(4) 0.0002(3) 0.0051(3) 0.0032(3) 
S2 0.0119(3) 0.0131(3) 0.0125(4) 0.0003(3) 0.0044(3) -0.0001(3) 
O1 0.0150(10) 0.0195(11) 0.0175(11) 0.0011(9) 0.0085(9) -0.0017(8) 
O2 0.0142(10) 0.0164(10) 0.0145(11) -0.0023(8) 0.0033(9) -0.0004(8) 
N1 0.0145(12) 0.0131(12) 0.0093(12) -0.0017(10) 0.0030(11) 0.0000(10) 
N2 0.0150(12) 0.0150(12) 0.0134(13) -0.0015(10) 0.0044(11) -0.0009(10) 
C1 0.0212(16) 0.0194(15) 0.0130(16) 0.0036(13) 0.0064(14) 0.0080(13) 
C2 0.0268(17) 0.0143(15) 0.0193(17) -0.0008(13) 0.0087(15) -0.0003(13) 
C3 0.0169(15) 0.0183(15) 0.0184(16) 0.0032(13) 0.0072(14) -0.0016(12) 
C4 0.0171(15) 0.0161(15) 0.0150(15) 0.0054(12) 0.0064(13) 0.0029(12) 
C5 0.0176(16) 0.0166(15) 0.0176(16) -0.0021(13) 0.0041(14) -0.0012(12) 
C6 0.0126(15) 0.0249(17) 0.0222(17) 0.0053(14) 0.0071(14) 0.0012(12) 
C7 0.0176(15) 0.0154(15) 0.0185(16) -0.0010(13) 0.0087(14) -0.0025(12) 
C8 0.0170(15) 0.0162(14) 0.0134(15) -0.0004(12) 0.0069(13) 0.0002(12) 
C9 0.0116(14) 0.0123(14) 0.0155(15) 0.0035(12) 0.0056(13) -0.0017(11) 
C10 0.0116(14) 0.0211(15) 0.0139(15) -0.0007(13) 0.0060(13) 0.0019(12) 
C11 0.0180(16) 0.0206(16) 0.0180(16) -0.0026(13) 0.0067(14) -0.0027(13) 
C12 0.0250(17) 0.0280(18) 0.0201(17) 0.0049(15) 0.0096(15) 0.0058(14) 
C13 0.0245(18) 0.037(2) 0.0156(17) -0.0024(15) -0.0004(15) 0.0050(15) 
C14 0.0272(18) 0.0264(18) 0.0239(19) -0.0100(15) 0.0025(16) 0.0014(14) 
C15 0.0204(16) 0.0197(16) 0.0214(17) -0.0032(13) 0.0066(15) 0.0037(13) 
C16 0.0140(14) 0.0111(13) 0.0143(15) 0.0019(12) 0.0065(13) 0.0006(11) 
C17 0.0135(14) 0.0170(14) 0.0126(15) -0.0036(12) 0.0045(13) -0.0010(11) 
C18 0.0140(14) 0.0199(15) 0.0114(15) 0.0045(13) 0.0055(13) 0.0026(12) 
C19 0.0101(14) 0.0170(15) 0.0181(16) 0.0030(13) 0.0045(13) 0.0012(11) 
C20 0.0169(15) 0.0154(15) 0.0129(15) -0.0034(12) 0.0042(13) 0.0007(12) 
C21 0.0180(15) 0.0187(15) 0.0104(15) 0.0010(12) 0.0056(13) 0.0023(12) 
C22 0.0237(16) 0.0167(15) 0.0201(17) 0.0018(13) 0.0058(15) -0.0031(13) 
 
_geom_special_details 
; 
 All esds (except the esd in the dihedral angle between two l.s. planes) 
 are estimated using the full covariance matrix.  The cell esds are taken 
 into account individually in the estimation of esds in distances, angles 
 and torsion angles; correlations between esds in cell parameters are only 
 used when they are defined by crystal symmetry.  An approximate (isotropic) 
 treatment of cell esds is used for estimating esds involving l.s. planes. 
; 
 
loop_ 
 _geom_bond_atom_site_label_1 
 _geom_bond_atom_site_label_2 
 _geom_bond_distance 
 _geom_bond_site_symmetry_2 
 _geom_bond_publ_flag 
Br1 C1 1.900(3) . ? 
S1 C9 1.789(3) . ? 
S1 C7 1.828(3) . ? 
S2 O1 1.4249(19) . ? 
S2 O2 1.433(2) . ? 
S2 N1 1.667(2) . ? 
S2 C16 1.760(3) . ? 
N1 C9 1.407(3) . ? 
N1 C8 1.468(3) . ? 
N2 C9 1.253(3) . ? 
N2 C10 1.413(4) . ? 
C1 C2 1.376(4) . ? 
C1 C6 1.380(4) . ? 
C2 C3 1.380(4) . ? 
C3 C4 1.379(4) . ? 
C4 C5 1.391(4) . ? 
C4 C7 1.509(4) . ? 
C5 C6 1.389(4) . ? 
C7 C8 1.522(4) . ? 
C10 C11 1.386(4) . ? 
C10 C15 1.388(4) . ? 
C11 C12 1.381(4) . ? 
C12 C13 1.378(4) . ? 
C13 C14 1.373(5) . ? 
C14 C15 1.384(4) . ? 
C16 C17 1.383(4) . ? 
C16 C21 1.387(4) . ? 
C17 C18 1.381(4) . ? 
C18 C19 1.388(4) . ? 
C19 C20 1.395(4) . ? 
C19 C22 1.502(4) . ? 
C20 C21 1.379(4) . ? 
 
loop_ 
 _geom_angle_atom_site_label_1 
 _geom_angle_atom_site_label_2 
 _geom_angle_atom_site_label_3 
 _geom_angle 
 _geom_angle_site_symmetry_1 
 _geom_angle_site_symmetry_3 
 _geom_angle_publ_flag 
C9 S1 C7 92.23(13) . . ? 
O1 S2 O2 119.39(11) . . ? 
O1 S2 N1 107.77(11) . . ? 
O2 S2 N1 104.20(11) . . ? 
O1 S2 C16 109.00(12) . . ? 
O2 S2 C16 108.60(12) . . ? 
N1 S2 C16 107.20(12) . . ? 
C9 N1 C8 113.9(2) . . ? 
C9 N1 S2 121.51(18) . . ? 
C8 N1 S2 121.31(18) . . ? 
C9 N2 C10 123.7(2) . . ? 
C2 C1 C6 121.2(3) . . ? 
C2 C1 Br1 119.9(2) . . ? 
C6 C1 Br1 118.9(2) . . ? 
C1 C2 C3 118.8(3) . . ? 
C4 C3 C2 121.6(3) . . ? 
C3 C4 C5 118.8(3) . . ? 
C3 C4 C7 118.7(2) . . ? 
C5 C4 C7 122.5(3) . . ? 
C6 C5 C4 120.3(3) . . ? 
C1 C6 C5 119.3(3) . . ? 
C4 C7 C8 113.1(2) . . ? 
C4 C7 S1 114.3(2) . . ? 
C8 C7 S1 104.27(19) . . ? 
N1 C8 C7 104.7(2) . . ? 
N2 C9 N1 122.2(2) . . ? 
N2 C9 S1 129.1(2) . . ? 
N1 C9 S1 108.72(19) . . ? 
C11 C10 C15 119.3(3) . . ? 
C11 C10 N2 123.0(3) . . ? 
C15 C10 N2 117.4(3) . . ? 
C12 C11 C10 120.1(3) . . ? 
C13 C12 C11 120.6(3) . . ? 
C14 C13 C12 119.3(3) . . ? 
C13 C14 C15 120.9(3) . . ? 
C14 C15 C10 119.8(3) . . ? 
C17 C16 C21 121.4(3) . . ? 
C17 C16 S2 118.5(2) . . ? 
C21 C16 S2 120.0(2) . . ? 
C18 C17 C16 118.8(3) . . ? 
C17 C18 C19 121.1(3) . . ? 
C18 C19 C20 118.8(3) . . ? 
C18 C19 C22 120.6(3) . . ? 
C20 C19 C22 120.6(3) . . ? 
C21 C20 C19 120.9(3) . . ? 
C20 C21 C16 118.9(3) . . ? 
 
_diffrn_measured_fraction_theta_max    1.000 
_diffrn_reflns_theta_full              26.00 
_diffrn_measured_fraction_theta_full   1.000 
_refine_diff_density_max    0.690 
_refine_diff_density_min   -0.424 
_refine_diff_density_rms    0.078 
